# Supplementary material for: Opening the internal structure for transport of ions: improvement of the structural and chemical properties of single-walled carbon nanohorns for supercapacitor electrodes
Source: Royal Society of Chemistry journal article supplement (doi:10.1039/d0ra07748h), 2020-01-01
Supplement: d0ra07748h1.pdf [file d0ra07748h1.pdf]

## Supplementary Material

# Opening the Structure for Transport of Ions: Improvement of the Structural and Chemical Properties of Single-walled Carbon Nanohorns for Supercapacitor Electrodes

*Wojciech Zieba,<sup>1</sup> Piotr Olejnik,<sup>2</sup> Stanisław Koter,<sup>3</sup> Piotr Kowalczyk,<sup>4</sup>*

*Marta E. Plonska-Brzezinska<sup>2\*</sup> and Artur P. Terzyk<sup>1\*</sup>*

<sup>1</sup> Faculty of Chemistry, Physicochemistry of Carbon Materials Research Group, Nicolaus Copernicus University in Toruń, Gagarin Street 7, 87-100 Toruń, Poland

<sup>2</sup> Department of Organic Chemistry, Faculty of Pharmacy with the Division of Laboratory Medicine, Medical University of Białystok, Mickiewicza 2A, 15-222 Białystok, Poland

<sup>3</sup> Faculty of Chemistry, Department of Physical Chemistry, Nicolaus Copernicus University in Toruń, Gagarin Street 7, 87-100 Toruń, Poland

<sup>4</sup> College of Science, Health, Engineering and Education, Murdoch University, WA, 6150, Australia

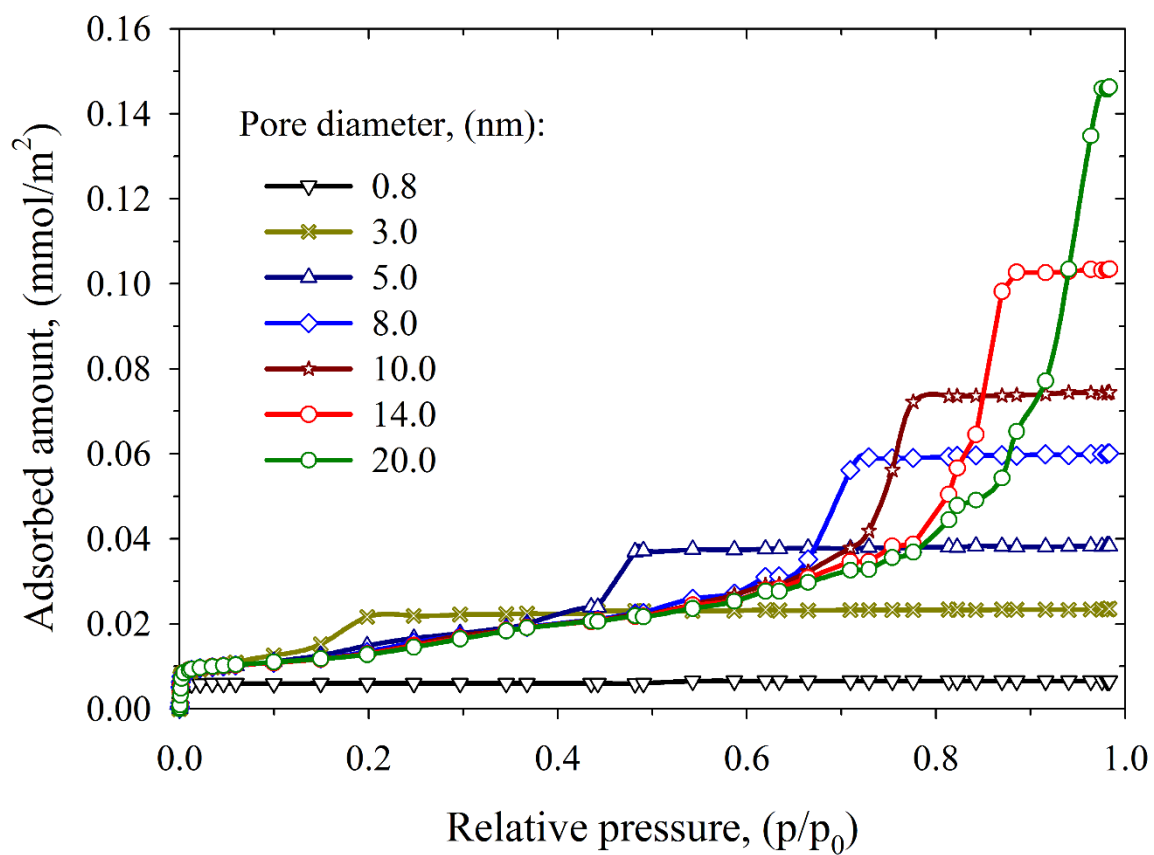

**Figure S1.** N<sub>2</sub> (77 K) adsorption isotherms in graphene cylinders simulated from GCMC method. Values of pore diameters are displayed on the plot.

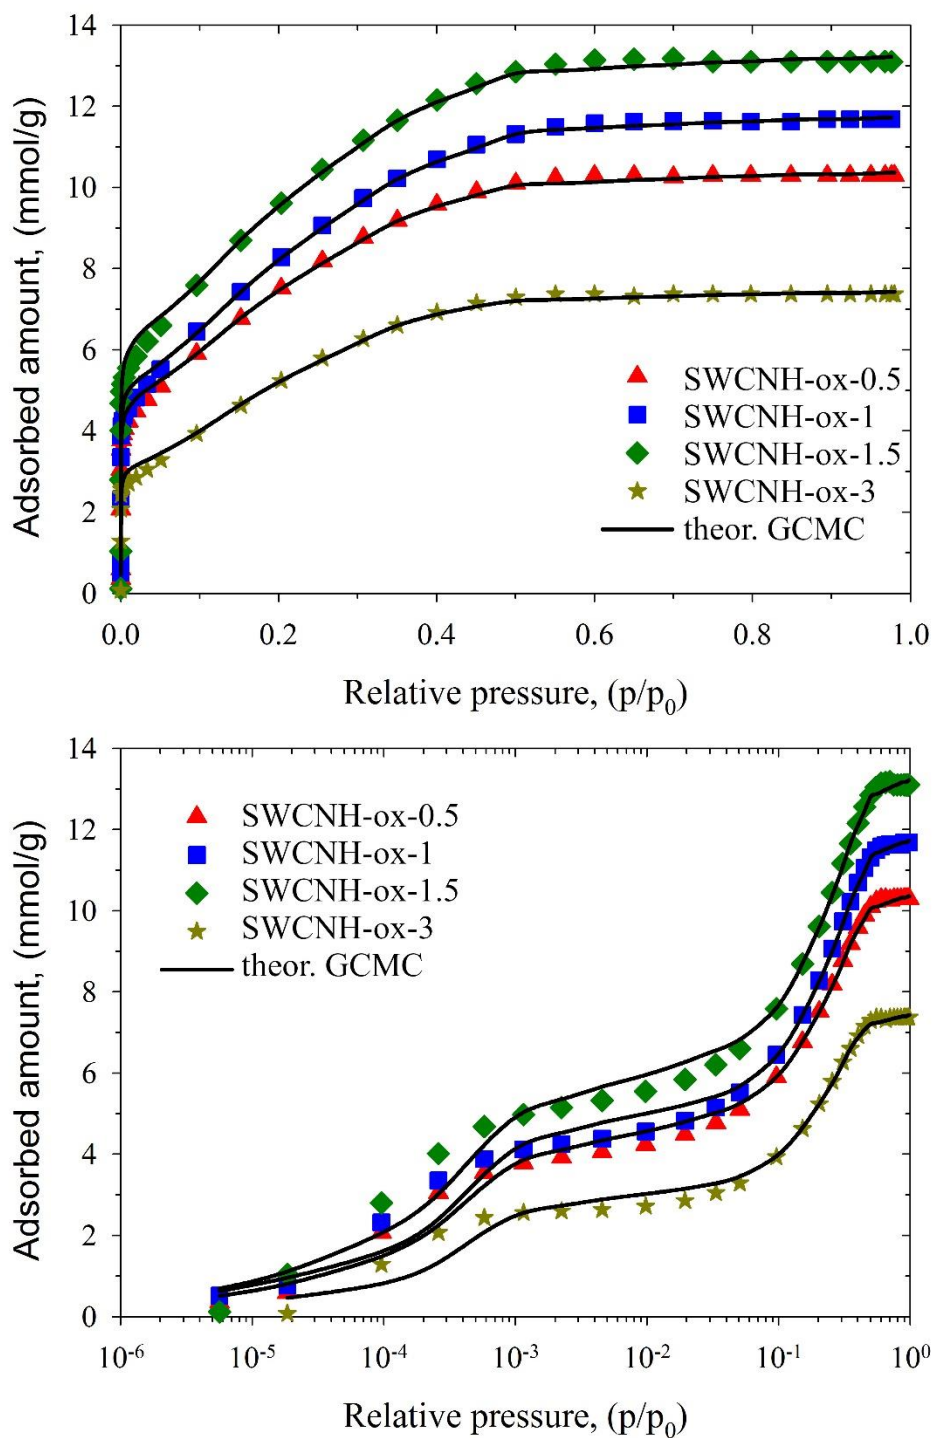

**Figure S2.** Experimental N<sub>2</sub> (77 K) adsorption isotherms inside SWNHs computed from Eq. (5) (in manuscript). The theoretical N<sub>2</sub> (77 K) adsorption isotherms inside SWNHs obtained from the fitting of the experimental ones by GCMC kernel are given by solid lines (Eq. (6) in manuscript).

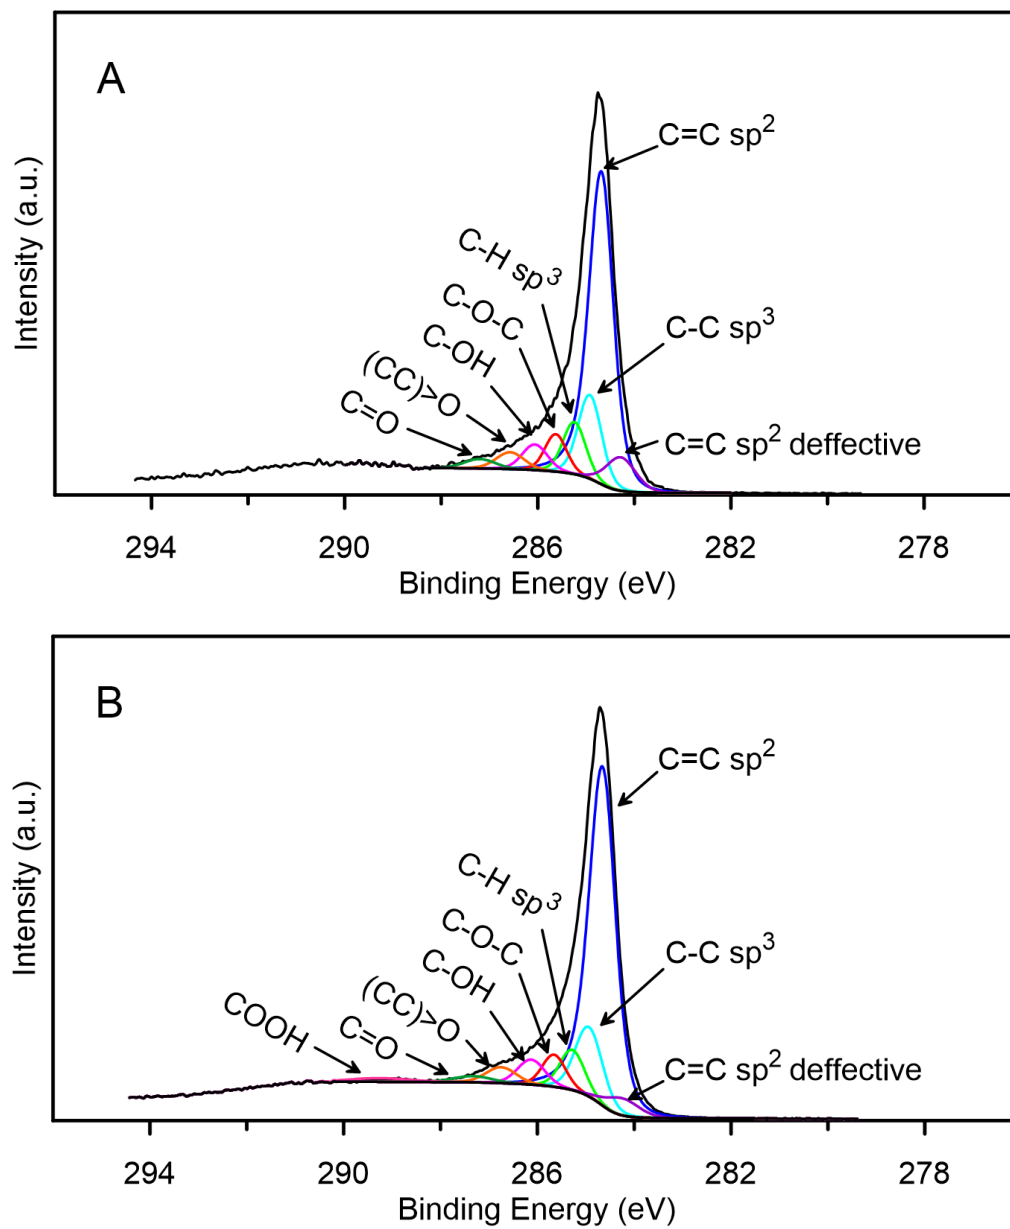

**Figure S3.** High-resolution C 1s XPS spectra for (A) SWCNH and (B) SWCNH-ox-1.5.

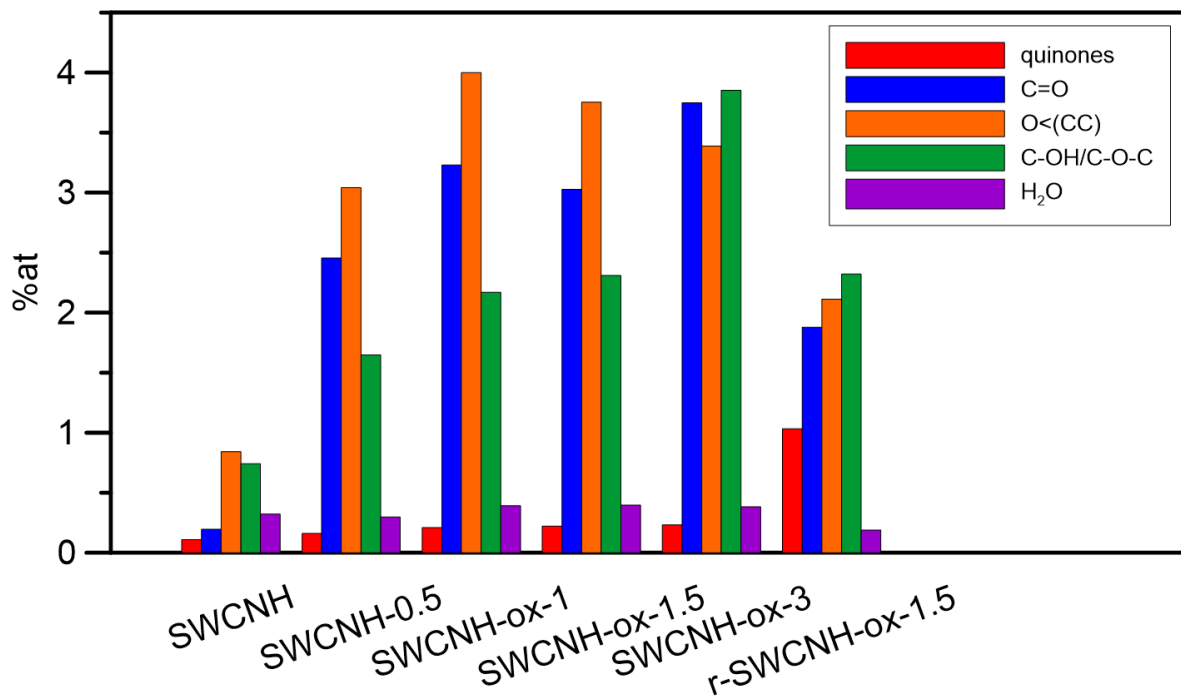

**Figure S4.** XPS atomic % of different forms of surface oxygen after wet HNO<sub>3</sub> modification based on O 1s XPS spectra.

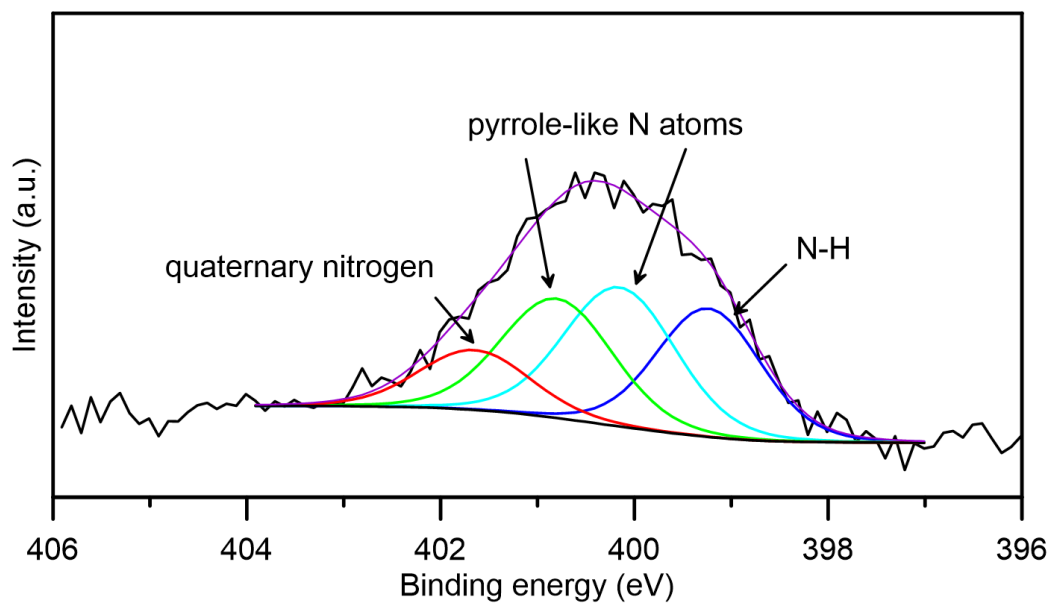

**Figure S5.** High-resolution N 1s XPS spectra for the r-SWCNH-ox-1.5.

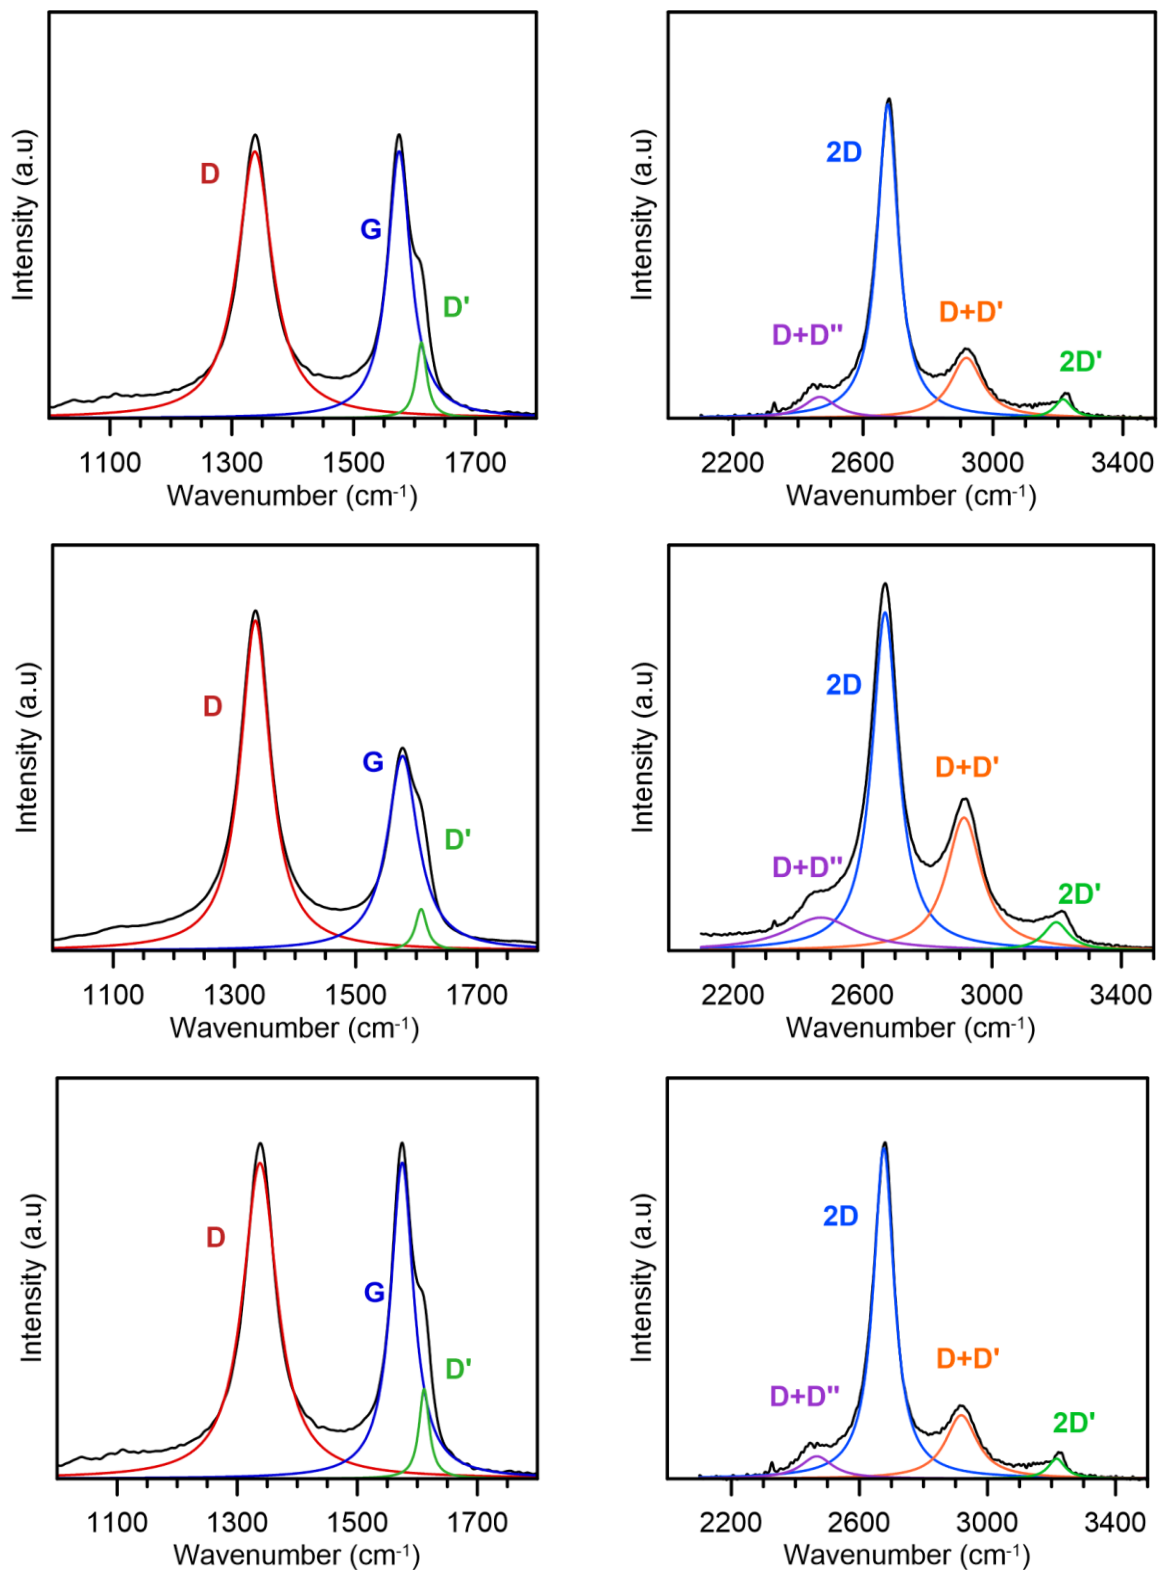

**Figure S6.** Deconvolution of Raman spectra for SWCNH (first row), SWCNH-ox-1.5 (second row) and r-SWCNH-ox-1.5 (bottom row).

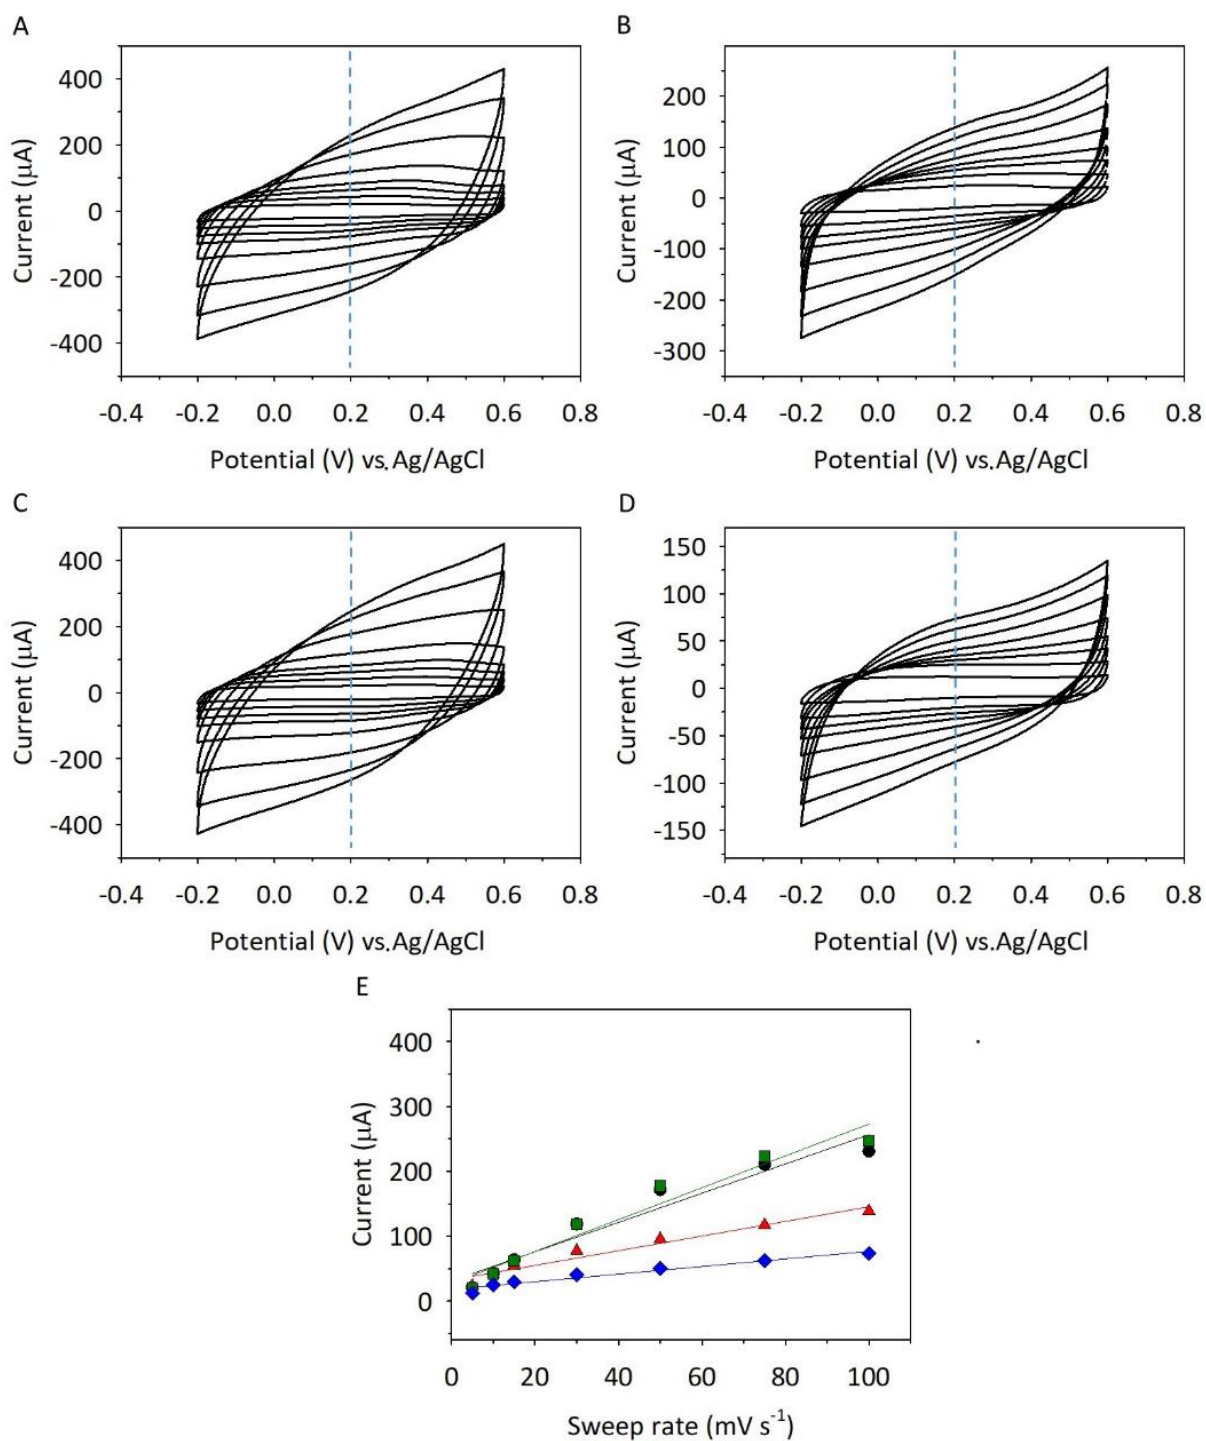

**Figure S7.** Cyclic voltammograms of SWCNH-ox-1.5 in 0.1 M different supporting electrolytes (A) NaCl, (B)  $\text{Na}_2\text{SO}_4$ , (C)  $\text{H}_2\text{SO}_4$ , and (D)  $(\text{Et})_4\text{NCl}$  at the different sweep rate: 5, 10, 15, 30, 50, 75, and 100  $\text{mV s}^{-1}$ . (E) Dependence of the current of SWCNH at 0.2 V (vs. Ag/AgCl) for (●) NaCl, (▼)  $\text{Na}_2\text{SO}_4$ , (▴)  $\text{H}_2\text{SO}_4$ , and (◆)  $(\text{Et})_4\text{NCl}$ .

**Table S1.** The specific element content based on the XPS results.

| Element | SWCNH                 | SWCNH-ox-0.5 | SWCNH-ox-1 | SWCNH-ox-1.5 | SWCNH-ox-3 | r-SWCNH-ox-1.5 |
|---------|-----------------------|--------------|------------|--------------|------------|----------------|
|         | %Atomic concentration |              |            |              |            |                |
| C       | 97.79                 | 92.4         | 90.0       | 90.3         | 88.4       | 89.6           |
| O       | 2.21                  | 7.6          | 10.0       | 9.7          | 11.6       | 7.5            |
| N       | 0                     | 0            | 0          | 0            | 0          | 2.9            |

**Table S2.** Studied ionic species: Stokes radius, hydrated radius and standard molar enthalpy of hydration.

| Ions                             | $r_s$<br>(nm) | $r_h$<br>(nm) | $\Delta_{\text{hyd}}H^\circ$<br>(kJ mol <sup>-1</sup> ) |
|----------------------------------|---------------|---------------|---------------------------------------------------------|
| Na <sup>+</sup>                  | 0.184         | 0.358         | -240.6                                                  |
| (Et) <sub>4</sub> N <sup>+</sup> | 0.282         | 0.400         | -154.9                                                  |
| SO <sub>4</sub> <sup>2-</sup>    | 0.230         | 0.379         | -903.7                                                  |
| Cl <sup>-</sup>                  | 0.121         | 0.332         | -363.0                                                  |

Stokes radius ( $r_s$ ), hydrated radius ( $r_h$ ) and standard molar enthalpy of hydration ( $\Delta_{\text{hyd}}H^\circ$ ). The reported Stokes and hydrated radii are from Ref. <sup>1</sup>. Standard molar enthalpy of hydration  $\Delta_{\text{hyd}}H^\circ$  values are from Ref. <sup>2</sup>.

**Table S3.** Specific capacitance of SWCNH, SWCNH-ox and r-SWCNH-ox in aqueous solution of different supporting electrolyte.

| Materials      | Specific capacitance (F g <sup>-1</sup> )                            |                                |                                              |                                |
|----------------|----------------------------------------------------------------------|--------------------------------|----------------------------------------------|--------------------------------|
|                | Integration $\Delta E_I$<br>(0.0 – 0.3 V vs. Ag/AgCl) <sup>[a]</sup> |                                | $I - v$ (slope)<br>$E_I$ (0.2 V vs. Ag/AgCl) |                                |
|                | NaCl                                                                 | H <sub>2</sub> SO <sub>4</sub> | NaCl                                         | H <sub>2</sub> SO <sub>4</sub> |
| SWCNH          | 32                                                                   | 65                             | 29                                           | 62                             |
| SWCNH-ox-0.5   | 127                                                                  | 175                            | 118                                          | 165                            |
| SWCNH-ox-1.0   | 169                                                                  | 177                            | 159                                          | 168                            |
| SWCNH-ox-1.5   | 230                                                                  | 233                            | 212                                          | 228                            |
| SWCNH-ox-3.0   | 227                                                                  | 184                            | 218                                          | 176                            |
| r-SWCNH-ox-1.5 | 95                                                                   | 134                            | 88                                           | 130                            |

[a] at  $v = 20 \text{ mV s}^{-1}$

1 A. K. Covington and T. Dickinson, *Physical Chemistry of Organic Solvent Systems*, Springer US, Boston, MA, 1973.

2 D. Dobos, *Electrochemical data: a handbook for electrochemists in industry and universities*, Elsevier Scientific Pub. Co, Amsterdam ; New York, 1975.
